# Supplementary material for: One-pot self-assembly synthesis of H3+xPMo12−xVxO40@[Cu6O(TZI)3(H2O)9(NO3)n]·(H2O)15 for enhanced proton conduction materials
Source: Royal Society of Chemistry journal article supplement (doi:10.1039/d1nj06090b), 2022-01-01
Supplement: d1nj06090b2.pdf [file d1nj06090b2.pdf]

## Supporting Information-*New Journal of Chemistry*

# One-pot self-assembly synthesis of $H_{3+x}PMo_{12-x}V_xO_{40}@[Cu_6O(TZI)_3(H_2O)_9(NO_3)_n]\cdot(H_2O)_{15}$ for enhanced proton conduction materials

Yuxiang Xin<sup>1</sup>, Yijia Zhou<sup>1</sup>, Longzhang Dong<sup>2</sup>, Pengpeng Wei<sup>1</sup>, Xiaoyan Zou<sup>1,\*</sup>, Fengming Zhang<sup>3</sup> and Guangming Li<sup>1,\*</sup>

*1. Key Laboratory of Functional Inorganic Material Chemistry (MOE), School of Chemistry and Materials Science, Heilongjiang University, Harbin 150080, P. R. China*

*2. Jiangsu Collaborative Innovation Centre of Biomedical Functional Materials, Jiangsu Key Laboratory of New Power Batteries, School of Chemistry and Materials Science, Nanjing Normal University, Nanjing, 210023, P. R. China.*

*3. School of Material Science and Chemical Engineering, Harbin University of Science and Technology, No.4, Linyuan Road, Harbin 150040, P. R. China.*

E-mail: [gml\\_i\\_2000@163.com](mailto:gml_i_2000@163.com)

E-mail: [2006151@hlju.edu.cn](mailto:2006151@hlju.edu.cn)

**Table S1.** Crystallographic data for complexes **3** and **4**.

| Parameters                                                                                                  | <b>3</b>                                                                                                           | <b>4</b>                                                                                                           |
|-------------------------------------------------------------------------------------------------------------|--------------------------------------------------------------------------------------------------------------------|--------------------------------------------------------------------------------------------------------------------|
| Empirical formula                                                                                           | C <sub>108</sub> H <sub>36</sub> Cu <sub>24</sub> N <sub>48</sub> O <sub>127</sub> PMo <sub>7</sub> V <sub>5</sub> | C <sub>108</sub> H <sub>36</sub> Cu <sub>24</sub> N <sub>48</sub> O <sub>116</sub> PMo <sub>4</sub> V <sub>8</sub> |
| CCDC Nos.                                                                                                   | 2126950                                                                                                            | 2093327                                                                                                            |
| Formula weight                                                                                              | 6536.28                                                                                                            | 6401.28                                                                                                            |
| Crystal system                                                                                              | cubic                                                                                                              | cubic                                                                                                              |
| Space group                                                                                                 | <i>Fmm</i>                                                                                                         | <i>Fmm</i>                                                                                                         |
| Unit cell                                                                                                   | $a=b=c=44.5096$ (2) Å                                                                                              | $a=b=c=44.4496$ (2) Å                                                                                              |
| Volume                                                                                                      | $\alpha=\beta=\gamma=90^\circ$<br>88178.2(12) Å <sup>3</sup>                                                       | $\alpha=\beta=\gamma=90^\circ$<br>87822.1(12) Å <sup>3</sup>                                                       |
| <i>Z</i>                                                                                                    | 8                                                                                                                  | 8                                                                                                                  |
| Density (calcd)                                                                                             | 0.985 g·cm <sup>-3</sup>                                                                                           | 0.968 g·cm <sup>-3</sup>                                                                                           |
| Temperature                                                                                                 | 293.00 (2) K                                                                                                       | 100.00 (2) K                                                                                                       |
| Wavelength                                                                                                  | 1.54184 Å                                                                                                          | 1.54184 Å                                                                                                          |
| Reflections collected                                                                                       | 50415                                                                                                              | 24270                                                                                                              |
| $\mu$                                                                                                       | 1.480 mm <sup>-1</sup>                                                                                             | 3.978 mm <sup>-1</sup>                                                                                             |
| <i>F</i> (000)                                                                                              | 25311.0                                                                                                            | 24856.0                                                                                                            |
| Final <i>R</i> <sub>1</sub> <sup>a</sup> , <i>wR</i> <sub>2</sub> <sup>b</sup> [ <i>I</i> > 2σ( <i>I</i> )] | 0.0652, 0.2000                                                                                                     | 0.0922, 0.2757                                                                                                     |
| Final <i>R</i> <sub>1</sub> <sup>a</sup> , <i>wR</i> <sub>2</sub> <sup>b</sup> (all data)                   | 0.0697, 0.2040                                                                                                     | 0.0978, 0.2861                                                                                                     |
| GOF on <i>F</i> <sup>2</sup>                                                                                | 1.107                                                                                                              | 1.054                                                                                                              |

**Table S2.** A comparison of POMs@MOFs proton-conduction.

| POMs@MOFs                                                                                      | Conditions   | Conductivity/S cm <sup>-1</sup> | Ref |
|------------------------------------------------------------------------------------------------|--------------|---------------------------------|-----|
| NENU-3                                                                                         | 363K 70% RH  | 4.76×10 <sup>-5</sup>           | 1   |
| HPW@MIL-101                                                                                    | 353K 100% RH | 2.17×10 <sup>-5</sup>           | 2   |
| PMoV <sub>2</sub> @MIL-101                                                                     | 353K 98% RH  | 6.31×10 <sup>-3</sup>           | 3   |
| PMoV@MIL-101                                                                                   | 303K 98% RH  | 4.14×10 <sup>-4</sup>           | 3   |
| [Zn <sub>12</sub> (trz) <sub>20</sub> ][SiW <sub>12</sub> O <sub>40</sub> ] 11H <sub>2</sub> O | 368K 95% RH  | 1.2×10 <sup>-4</sup>            | 4   |
| NENU-530                                                                                       | 348K 98% RH  | 1.5×10 <sup>-3</sup>            | 5   |
| NENU-531                                                                                       | 348K 98% RH  | 1.7×10 <sup>-4</sup>            | 5   |

## Notes and References

1. Y. Liu, X. Yang, J. Miao, Q. Tang, S. Liu, Z. Shi and S. Liu, *Chem. Commun.*, 2014, **50**, 10023-10026.
2. X. Y. Lai, Y. W. Liu, G. C. Yang, S. M. Liu, Z. Shi, Y. Lu, F. Luo, and S. X. Liu, *J. Mater. Chem. A*, 2017, **5**, 9611-9617.
3. F. Wang, C. Liang, J. Tang, F. Zhang and F. Qu, *New J. Chem.* 2020, **44**, 1912-1920.
4. E. L. Zhou, C. Qin, X. L. Wang, K. Z. Shao and Z. M. Su, *Chem. Eur. J.*, 2015, **21**, 13058-13064.
5. J. Li, X. L. Cao, Y. Y. Wang, S. R. Zhang, D. Y. Du, J. S. Qin, S. L. Li, Z. M. Su and Y. Q. Lan, *Chem. Eur. J.*, 2016, **22**, 9299-9304.
